# Supplementary material
Source: Elsevier journal article supplement (https://www.sciencedirect.com/science/article/pii/S0211139X22001020)
Supplement: mmc1 [file S0211139X22001020:mmc1.doc]

**SUPPLEMENTARY MATERIAL**

Appendix


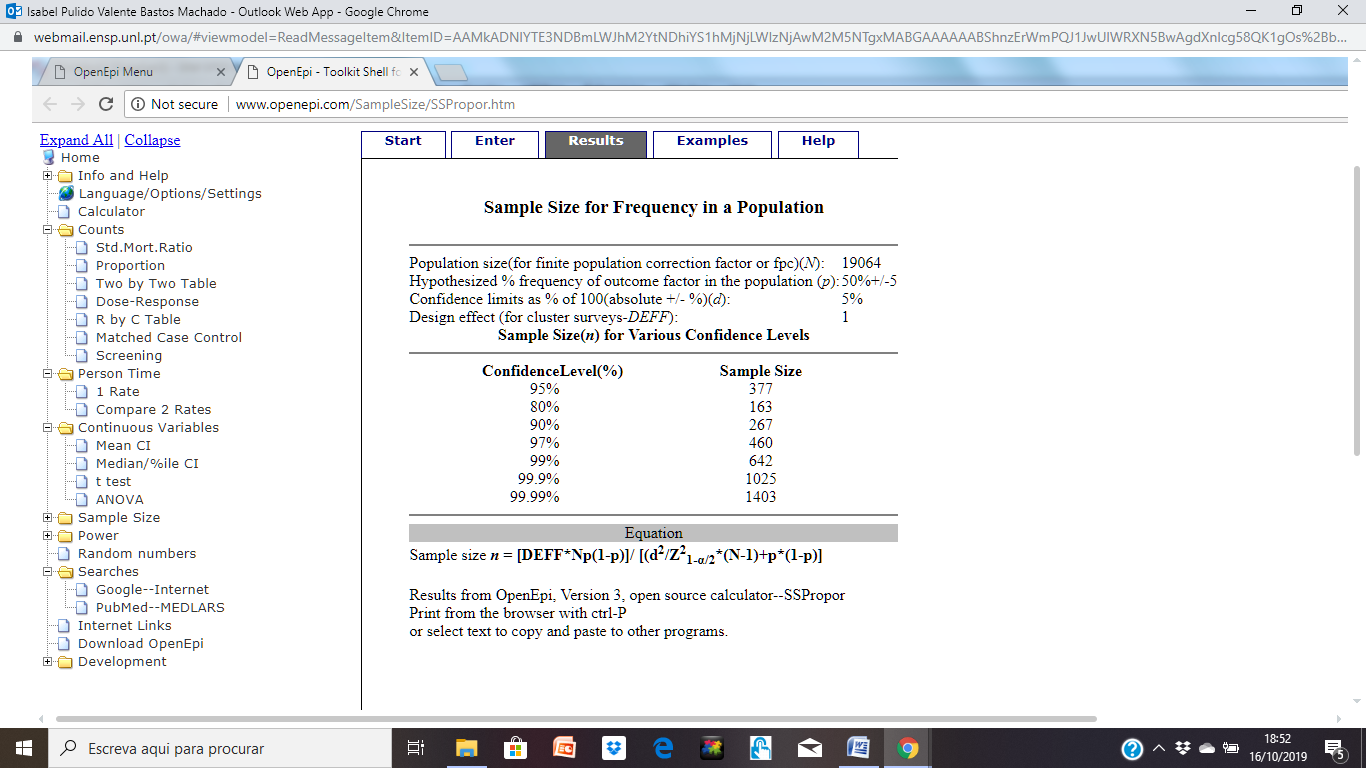


**Figure 1 – Determination of sample size**

**Table 1** – **Collected variables, categorizations, cut-offs and classifications**

| **Variables** | | **Categorisation** |
| --- | --- | --- |
| Sex | | Male; Female |
| Age | | 65–74; 75–84; 85 and older |
| Do you have a family physician? | | Yes; No |
| Living environment | | Urban; rural |
| Place of living | | Home; nursing home |
| Who do you live with? | | Younger family; family of the same age; in nursing home; alone |
| Education level | | Illiterate; primary education; lower secondary education; upper secondary education; tertiary education |
| Number of active medical problems | | All numbers |
| Active medical problems | | Any by ICD10 |
| Multimorbidity[6] | | Having ≤ 2 chronic health conditions; > 2 chronic health conditions |
| Charlson Comorbidity Index[30] | | All numbers |
| Charlson Comorbidity Index | | Low risk; Intermediate or high risk |
| Polypharmacy[7] | | < 4 current medications; ≥ 4 current medications |
| Number of different daily medicines | | All numbers |
| Number of ED admissions during 2017 | | All numbers |
| Admission/discharge | | hospital admission; discharge |
| **Frequent users** | | **< 3 admissions/year; ≥ 3 admissions/year** |
| The Katz Index of Independence in Activities of Daily Living | | Independent with 6 points; Dependent from 0 to 5 points |
| The Lawton and Brody Scale | | Independent, low dependent  Moderate dependence, severe dependence, totally dependent |
| Holden's Gait Scale | | Independent walking; all types of dependent walking |
| Geriatric Depression Scale (GDS-15) | | No depression; mild or severe depression |
| Mini-mental State Examination (MMSE) | | No cognitive impairment; cognitive impairment |
| Mini-nutritional assessment | | Normal; undernourished or malnutrition risk |
| Body mass index | | All numbers |
| GIJON scale | | No risk; social risk |
| Family APGAR scale | | No dysfunction; Family dysfunction; No Family |
| GRAFFAR test | | Upper class, middle-upper class and middle class; middle - lower class and lower class |
| **Score** | **Variables included** | **Definition of cut-off** |
| Social | GIJON scale, Family APGAR scale, GRAFFAR test | ˂2 advantage;  ≥ 2 disadvantage |
| Clinical | Charlton Comorbidity index, multimorbidity, polypharmacy, Mini-nutritional assessment | ˂2 advantage;  ≥ 2 disadvantage |
| Functional | Kats Scale, Lawton and Brody Scale, Holden's Gait Scale | ˂2 advantage;  ≥ 2 disadvantage |
| Mental | Geriatric Depression Scale and Mini-mental State Examination | ˂1advantage;  ≥ 1 disadvantage |

**Table 2 - Differences in clinical, functional, mental, and social characteristics between frequent and non-frequent users.**

| Variables | ED frequent users | | | p ≤ 0.05 |
| --- | --- | --- | --- | --- |
| Values allowed | No | Yes |
| Sex | Male | 114 (57.9%) | 83 (42.1%) | 0.42 |
| Female | 142 (62%) | 87 (38%) |
| Age | 65–74 | 90 (68.7%) | 41 (31.3%) | 0.05 |
| 75–84 | 101 (56.4%) | 78 (43.6%) |
| Over 85 | 65 (56.0%) | 51 (44.0%) |
| Do you have a family physician? | Yes | 215 (60.9%) | 138 (39.1%) | 0.53 |
| No | 41 (56.2%) | 32 (43.8%) |
| Living environment | Urban | 55 (68.8%) | 25 (31.3%) | 0.10 |
| Rural | 201 (58.1%) | 145 (41.9%) |
| Place of living | Home | 231 (60.2%) | 153 (39.8%) | 1.00 |
| Nursing home | 25 (59.5%) | 17 (40.5 %) |
| Whom do you live with? | Younger family | 58 (58.6%) | 41 (41.4%) | 0.97 |
| Family of the same age | 104 (60.1%) | 69 (39.9%) |
| Nursing home | 25 (59.5%) | 17 (40.5%) |
| Alone | 69 (61.6%) | 43 (38.4%) |
| Multimorbidity | ≤ 2 chronic health conditions | 47 (72.3%) | 18 (27.7%) | 0.04 |
| >2 chronic health conditions | 209 (57.9%) | 152 (42.1%) |
| Charlson Comorbidity index | Low risk | 90 (48.4%) | 96 (51.6%) | 0.00 |
| Intermediate or high risk | 166 (69.2%) | 74 (30.8%) |
| Polypharmacy | < 4 current medication | 103 (73.0%) | 38 (27.0%) | 0.00 |
| ≥ 4 current medication | 153 (53.7%) | 132 (46.3%) |
| Admission/discharge | Discharge | 186 (61.8%) | 115 (38.2%) | 0.31 |
| Admission | 70 (56.0%) | 55 (44%) |
| Katz Index of Independence in Activities of Daily Living | Independence | 135 (64.9%) | 73 (35.1%) | 0.06 |
| Dependent | 121 (55.5%) | 97 (44.5%) |
| Lawton& Brody instrumental activities of daily living scale | Independent or low dependence | 124 (64.9%) | 67 (35.1%) | 0.08 |
| Moderate, severe and total dependence | 132 (58.2%) | 103 (43.8%) |
| Holden's Gait Scale | Independent walking | 163 (63.9%) | 92 (36.1%) | 0.06 |
| All types of dependent walking | 93 (54.4%) | 78 (45.6%) |
| Geriatric Depression Scale | No depression | 121 (59.1%) | 84 (40.9%) | 0.05 |
| Mild or severe depression | 135 (61.1%) | 86 (38.9%) |
| Mini-Mental State Examination | No cognitive impairment | 97 (66.4%) | 49 (33.5%) | 0.15 |
| Cognitive impairment | 159 (56.8%) | 121 (43.2) |
| Mini-nutritional Assessment | Normal | 110 (70.1%) | 47 (29.9%) | 0.00 |
| Malnutrition risk or undernourished | 146 (54.3%) | 123 (45.7%) |
| GIJON scale | No social risk | 181 (63.5%) | 104 (36.5%) | 0.05 |
| Social risk | 75 (53.2%) | 66 (46.8%) |
| Family APGAR scale | No dysfunction | 122(67.4%) | 59 (32.6%) | 0.02 |
| Family dysfunction | 107 (55.4%) | 86 (44.6%) |
| No family | 27 (51.9%) | 25 (48.1%) |
| Graffar Test | Upper class, middle-upper class, and middle class | 88 (57.5%) | 65 (42.5%) | 0.47 |
| Middle - lower class and lower class | 168 (61.5%) | 105 (38.5%) |
| Social score | Advantage | 142 (64.8%) | 77 (35.2%) | 0.05 |
| Disadvantage | 114 (55.1%) | 93 (44.9%) |
| Clinical score | Advantage | 70 (80.5%) | 17 (19.5%) | 0.00 |
| Disadvantage | 186 (54.9%) | 153 (45.1%) |
| Functional score | Advantage | 123 (64.1%) | 69 (35.9%) | 0.15 |
| Disadvantage | 133 (56.8%) | 101 (43.2%) |
| Mental score | Advantage | 50 (69.4%) | 22 (30.5%) | 0.16 |
| Disadvantage | 206 (58.2%) | 148 (41.8%) |
